# Supplementary material for: Increased methylglyoxal formation in plasma and tissues during a glucose tolerance test is derived from exogenous glucose
Source: Oxford University Press journal article supplement (doi:10.1042/cs20220753), 2023-01-20
Supplement: cs-2022-0753_supp.pdf [file cs-2022-0753_supp.pdf]

## Supplementary data

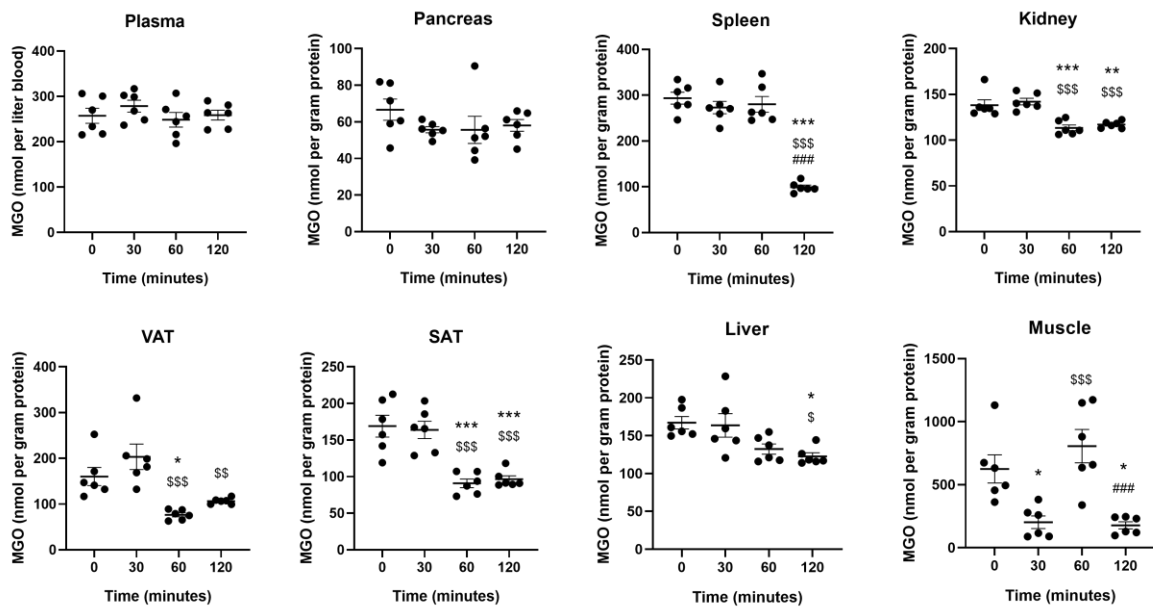

**Figure S1. MGO levels in tissues during a 2-hour IPGTT in mice.** MGO concentrations were analysed by UPLC-MS/MS, in plasma, pancreas, spleen, kidney, SAT, VAT, liver, and muscle tissues from C57BL/6J male mice, 10-11 weeks old. Mice were grouped for different time points,  $n=6$  per group. Data are shown as mean  $\pm$  SEM. Comparisons of MGO levels at different time points were tested using the ordinary one-way ANOVA with Tukey's multiple comparison. \* represents comparisons with time 0, \$ represents comparisons with time 30 min, and # represents comparisons with 60 min. \*/\$/# indicates  $p < 0.05$ , \*\*/\$\$/\$## indicates  $p < 0.01$ , and \*\*\*/\$\$\$/\$### indicates  $p < 0.001$ .
